# Supplementary material
Source: Research Square preprint supplement (doi:10.21203/rs.3.rs-9431384/v1)
Supplement: Supplementary file 1 [file 84e20603fc75ece265a1307d.docx]

**Table 2: Statements indicating consensus across all factors according to factor analysis**

| **Consensus statements** | **Z-scores** | | | |
| --- | --- | --- | --- | --- |
| ID | Factor 1 | Factor 2 | Factor 3 |
| Rat eradication using SSOS would increase population of other pest species | 10 | 0.04 | -0.28 | 0.28 |
| Climate change induced pest numbers will mean we’ll need control methods, like SSOS, in the future | 12 | 0.47 | 0.34 | -0.00 |
| SSOS should only be used if demonstrated to be safe | 20 | 1.26 | 0.92 | 0.49 |
| My own opinion counts in the decision whether to use SSOS | 23 | -0.33 | -0.11 | -0.23 |
| Treaty/Tiriti partners should agree on SSOS before it is used | 24 | 1.95 | 2.27 | 1.42 |

**Notes**: The ID column is the allocated number of the statement. Z-scores give an indication of the degree to which participants agreed (+ve) or disagreed (−ve) with the given statements. Those statements flagged with an * (*Asterix*) are considered ‘non-significant’ at P > 0.05. For expediency, consensus statements with Z-score loadings between 0.5 and -0.5; and with *confounded* ‘+ve *and* neutral *and* -ve’ loadings across all three factors have been excluded for data analysis purposes.
