# Supplementary material
Source: Research Square preprint supplement (doi:10.21203/rs.3.rs-9431384/v1)
Supplement: Supplementary file 2 [file 9d5096eb460633b944d2c088.docx]

| **Table 4: A summary of reasons given to explain *positive views* about SSOS** | **Comment themes** |
| --- | --- |
| I like the sound of [SSOS] ... it just also seems less painful (F3, *Whatipū*)  I think the spreading of a selfish gene is a better … like feels slightly less invasive than if you're just going to give like a rat [poison] or something. They just kind of pass traits on to all the offspring. I find that less invasive (F1, *Waitā*)    I like the idea is that it can spread without human intervention (F1, *Waitī*)    That’s exciting if it works, shit! It friggin is! But that’s how, it’s got to be an innovation if we want to stem the tide and bring about change, we need to be innovative (F1, *Atutahi*)    We’re in a plague. We’ve got rats everywhere ... We don’t have a choice, if we want to protect our indigenous biodiversity, we must address the pest problem (F1, *Atutahi*)  I liked that. I also liked the nonchemical approach (F1, *Waitā*)    If we’re talking about the number of resources [needed for conventional pest control programs] … SSOS could use less resources, less manpower, could reach areas that humans couldn't get to, [and] be a lot more effective than the current approaches (F1, *Waitā*)    I think it'd be quite difficult to ‘jump’ species. If it is a true selfish-gene element, it doesn't seem like something that would easily transmit into another species. So, I'm relatively comfortable with it (*Aotahi*)  The beauty of SOSS is, unlike any other pest control methods that I'm aware of, this is species-targeted and that's one of its big strengths if not its biggest strength (F1, *Kōpū*)    I think it’s ingenious ... the technology sounds great. I'm just … it's the multitude of unknowns (F1, *Aotahi*)    I think that’s a great idea. I hate rats (F1, *Kōpū*)    From a purely pest-control protection-of-our-*taonga* perspective, I'm absolutely 100% supportive of it. Because you know, our current tools, be the trapping, Brodifacoum, 1080 … they all have limits. You know, we can't drop 1080 over the city ... [as] we already know that ... they’re neophobic and don't want to go anywhere near traps (F1, *Tupuārangi*)    The tools we have, won't work on a grand scale. So, I'm personally supportive of it (F1, *Tupuārangi*) | More humane  Less invasive than poison  Self-propagating  New and different  Environment in crisis  Less poisonous  More economic approach  Species-specific  Species-specific  Next-generational  Aversion to rats  Conventional pest control methods not fit-for-purpose  Potential for landmass-scale control |
