# Supplementary material
Source: Research Square preprint supplement (doi:10.21203/rs.3.rs-9431384/v1)
Supplement: Supplementary file 3 [file d4e46608b43856ffacaa5338.docx]

| **Table 4: A summary of reasons given to explain *negative views* about SSOS** | **Comment themes** |
| --- | --- |
| I'm very hesitant, and I understand the technology, and I understand the theory, but once it's out, it's out and the ‘horse has bolted’ (F2, *Karaka*)  I guess I feel still that I'm not knowledgeable enough to decide about whether we should go ahead with this (F2, *Tītoki*)  I'm always hesitant. Do we know enough about these genes and the [genetic] codes and what we're doing. Because, *on paper* our ability to use CRISPR genetic editing material is fine, but… (F2, *Karaka*)  Nature has its way. Who are we to believe that we can change millions of years of process and natural selection (F2, *Karaka*)  I just find it's arrogant that we can do that and think about that. We [humans] are invasive in New Zealand. Do we try and breed us out because we're causing more damage to our natural environment than the rats are? (F2, *Karaka*)  [SSOS] felt like a higher level of interference because it was going across species. And then I imagined if this thinking in any way went towards humans … you wouldn't want it to be like a slippery slope (F1, *Waitī*)  [SSOS] is an innovation that has not come from our *mātauranga ‘*knowledge’. I think it's purely a Western science methodology that hasn't incorporated how we connect to our species, and it's just a tool that's been enforced onto us, not something that we do or believe in... tampering with genetics (F2, *Kānuka*)  I think there needs to be a piece of work that looks at the *whakapapa* of the species and the relationships that have they within their own countries for us to feel like we’ve got rights to doing what we’re doing, especially around genetics (F2, *Kānuka*)  All of that it’s going to take time; they are going to have to do it carefully and they’re going to have to do it with consent, and it’s going to cost money as well, which means the taxpayers, the decision makers, the government are going to have to be onboard and be persuaded that this is a long-term investment worth making (F1, *Kōpū*)  I feel like gene editing always makes me feel a little nervous, squeamish and uncomfortable just because ... how that can be used negatively against other animals or people (*Tītoki*)  Who are you, God? Who gives [scientists] the right to do that to another living creature? (F2, *Māikaika*)  When it comes to changing the species, editing, that's when it gets scary, but they're doing it... the thing that always scared me about this science...people wanna be pioneers, and they wanna be ‘the first’ (*Kākahi*) | Precautions needed  Non-familiarity  Gap between theory and reality  Nature self-correcting  Example of human overreach  Unforeseen circumstances  Foreign concept  Ethical and cultural appraisal needed  Protracted process for consent  Risks to non-target species  Ethically unsound  Technological ‘rat race’ |
