# Supplementary material
Source: Research Square preprint supplement (doi:10.21203/rs.3.rs-9431384/v1)
Supplement: Supplementary file 4 [file dae8ea8fa734285855f463a9.docx]

| **Table 1: Participant demographics** | | | | |
| --- | --- | --- | --- | --- |
| Participant I.D (coded) | Age estimate | Māori /  non-Māori | Gender | Field/s of  expertise/interest |
| **Factor 1, *Kia māia* ‘Be bold’** | | | | |
| Kōpū | 50+ | Māori | M | Mātauranga Māori (mM), climate change (Cc), palynology |
| Pōhutukawa | 30+ | Non-Māori | F | Teaching, mentoring, conservation, pest management |
| Matariki | 30+ | Māori | F | mM, Treaty-rights & conservation policy analyst |
| Tupuārangi | 30+ | Māori | M | mM, ecology, conservation, pest management |
| Atutahi | 40+ | Māori | F | Environmental policy analyst, conservation |
| Tupuānuku | 50+ | Non-Māori | M | Pest management, organic food |
| Waitā | 30+ | Māori | M | mM, Cc, conservation, Māori language revitalisation |
| Waitī | 20+ | Māori | F | mM, psychology, biology |
| Aotahi | 40+ | Māori | F | Ecology, biological sciences |
| **Factor 2, *Kia tūpato* ‘Be careful’** | | | | |
| Kānuka | 30+ | Māori | F | mM, environmental scientist, iwi governance |
| Māikaika | 30+ | Non-Māori | M | mM, conservation, pest management |
| Mānuka | 20+ | Māori | F | mM, environmental science, social science |
| Tītoki | 30+ | Māori | F | mM, Tiriti / environmental policy |
| Karaka | 40+ | Māori | M | Marine biology, biological sciences, iwi governance |
| Ngāio | 20+ | Māori | F | mM, Cc, biosecurity, environmental sciences, pest management |
| **Factor 3, *Kia māia* ‘Be alert’** | | | | |
| Whatipū | 20+ | Māori | NB | mM, environmental sciences, artist |
| Hine-Kōrako | 40+ | Māori | F | mM, political science, Treaty-rights, environmental policy |
| Tuhirangi | 60+ | Māori | M | mM, conservation, artist |
| **Non Q-Method participants (interview only)** | | | | |
| Kākahi | 60+ | Māori | M | mM, tribal governance, conservation, pest management |
| Tākawa | 30+ | Māori | F | mM, conservation, pest management, tourism |

**Key:** mM = mātauranga Māori ‘Indigenous Māori knowledge’; Cc = Climate change; and NB = Nonbinary

**Note**: Geographic locations of participant tribes in Figure 1, Right
