# Supplementary material
Source: Research Square preprint supplement (doi:10.21203/rs.3.rs-9431384/v1)
Supplement: Supplementary file 5 [file e700fe7c93e14798a160885a.docx]

**Table 3: Three factors (participant groupings) emerged from data analysis**

**Factor 1** – *Kia māia* ‘Be bold’ distinguishing statements

| **Distinguishing statements** | **Z-scores** | | | |
| --- | --- | --- | --- | --- |
| ID | **Factor 1** | Factor 2 | Factor 3 |
| Using SSOS could be a crucial step towards a Predator-free 2050 | 11 | 1.31* | 0.33 | -0.74 |
| SSOS would enhance the Māori guardianship/kaitiakitanga over the environment | 22 | 1.20* | -1.43 | -0.64 |
| I am comfortable with research being done on SSOS for pest control purposes | 6 | 0.71* | -0.66 | -1.29 |
| I worry that SSOS might have unforeseen circumstances | 1 | 0.61* | 1.28 | 1.70 |
| My consent to SSOS for rats is consent for the biotechnological control of other pests | 2 | 0.29* | -1.36 | -0.56 |
| I trust the scientists to develop ethical SSOS for rat control | 19 | -0.08 | -0.92 | -1.57 |
| There is enough information about biotechnological sciences (like genetic modification) to proceed with SSOS | 28 | -0.09* | -1.34 | -1.15 |
| Animal rights are relevant to discussions about using SSOS | 3 | -0.34* | 0.66 | 0.60 |
| SSOS should only be used in Aotearoa New Zealand with a social licence (support from the public) | 32 | -0.36* | 0.80 | 1.16 |
| I trust the government to only implement SSOS if most people agree | 14 | -0.72* | -1.61 | 0.56 |
| Pests, such as rats, could be eradicated from Aotearoa without SSOS | 9 | -1.07 | 0.25 | 0.41 |
| I’m concerned about the mauri, whakapapa, and wellbeing of rats if we use SSOS | 13 | -1.25* | 1.65 | 1.24 |
| Rat trapping and baiting gives me more personal satisfaction than SSOS would | 34 | -1.55* | 0.11 | -0.37 |
| Using SSOS to control rats is part of a multinational agenda to use biotechnologies in other spheres of life (like health & food) | 5 | -1.55* | 0.18 | 2.39 |
| Using SSOS to control rats is part of a multinational agenda to use biotechnologies in other spheres of life (like health & food) | 15 | -1.65* | -0.08 | -0.55 |

**Notes**: The ID column is the number of the statement. Z-scores give an indication of the degree to which participants agreed (+ve) or disagreed (−ve) with the given statements. For expediency, distinguishing statements in all 3 factors with ‘neutral’ Z-score loadings between 0.5 and -0.5 are excluded for data analysis purposes.

**Factor 2** *– Kia tūpato* ‘Be careful’ distinguishing statements

| **Distinguishing statements** | **Z-scores** | | | |
| --- | --- | --- | --- | --- |
| ID | Factor 1 | **Factor 2** | Factor 3 |
| Our research, skills, and funding should be put into developing alternatives to SSOS | 30 | -0.79 | 0.76* | -0.82 |
| SSOS should only be used under strict laboratory conditions | 21 | -0.42 | 0.71* | -0.41 |
| Using SSOS could be a crucial step towards a Predator-free 2050 | 11 | 1.31 | 0.33* | -0.74 |
| SSOS is an example of humans “playing God” | 5 | -1.55 | 0.18* | 2.39 |
| SSOS would take too long to effectively eradicate rats in Aotearoa | 29 | -1.18 | -0.06 | -1.47 |
| Using SSOS would enhance the economy in Aotearoa New Zealand | 17 | 0.47 | 1.48* | -0.00 |
| I trust the government to only implement SSOS if most people agree | 14 | -0.72 | -1.61* | 0.56 |

**Factor 3** *– Kia mataara* ‘Be alert’ distinguishing statements

| **Distinguishing statements** | **Z-scores** | | | |
| --- | --- | --- | --- | --- |
| ID | Factor 1 | Factor 2 | **Factor 3** |
| SSOS is an example of humans “playing God” | 5 | -1.55 | 0.18 | 2.39* |
| Religion or spirituality offer guidance on important national matters, like SSOS | 7 | -0.46 | 0.19 | 1.10* |
| Using SSOS in Aotearoa could lead to the extinction of the rats overseas | 8 | -0.94 | -0.43 | 0.64* |
| Mātauranga Māori has an important role to play in using SSOS, for pest control purposes | 25 | 1.91 | 2.13 | 0.64* |
| I trust the government to only implement SSOS if most people agree | 14 | -0.72 | -1.61 | 0.56* |
| Using SSOS could be a crucial step towards a Predator-free 2050 | 11 | 1.31 | 0.33 | -0.74* |
| I am knowledgeable enough to decide if SSOS should be used | 26 | -0.22 | -0.41 | -1.42* |
| The government should invest more funding into pest control methods, like SSOS | 16 | 1.12 | 0.47 | -1.80* |
